# Supplementary material for: Plasma Cotinine Is Positively Associated with Homocysteine in Smokers but Not in Users of Smokeless Tobacco
Source: MDPI journal article supplement (doi:10.3390/ijerph182111365), 2021-10-29
Supplement: s1 [file s1]

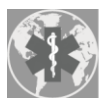

Supplementary Material

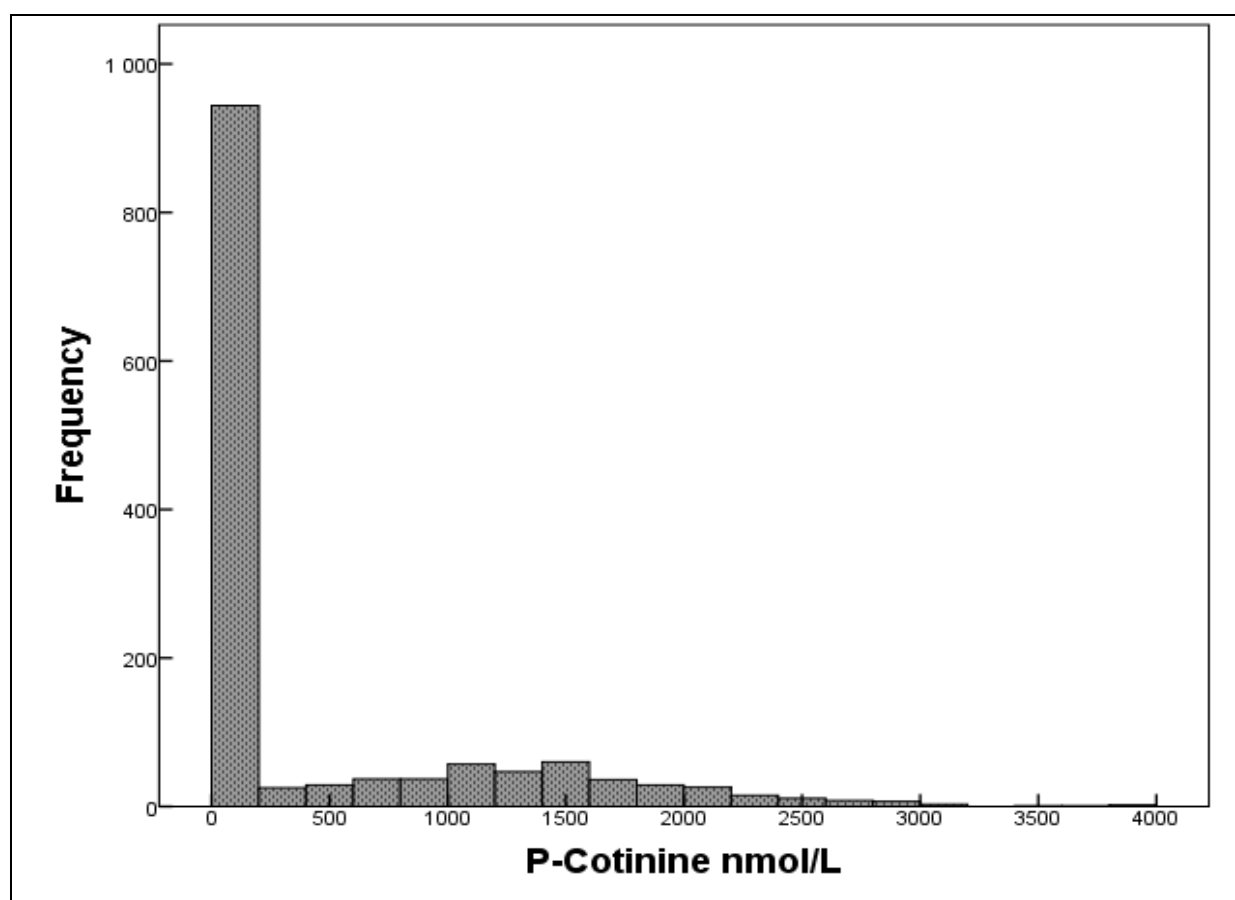

**Figure S1.** Distribution of plasma cotinine concentrations among all subjects.

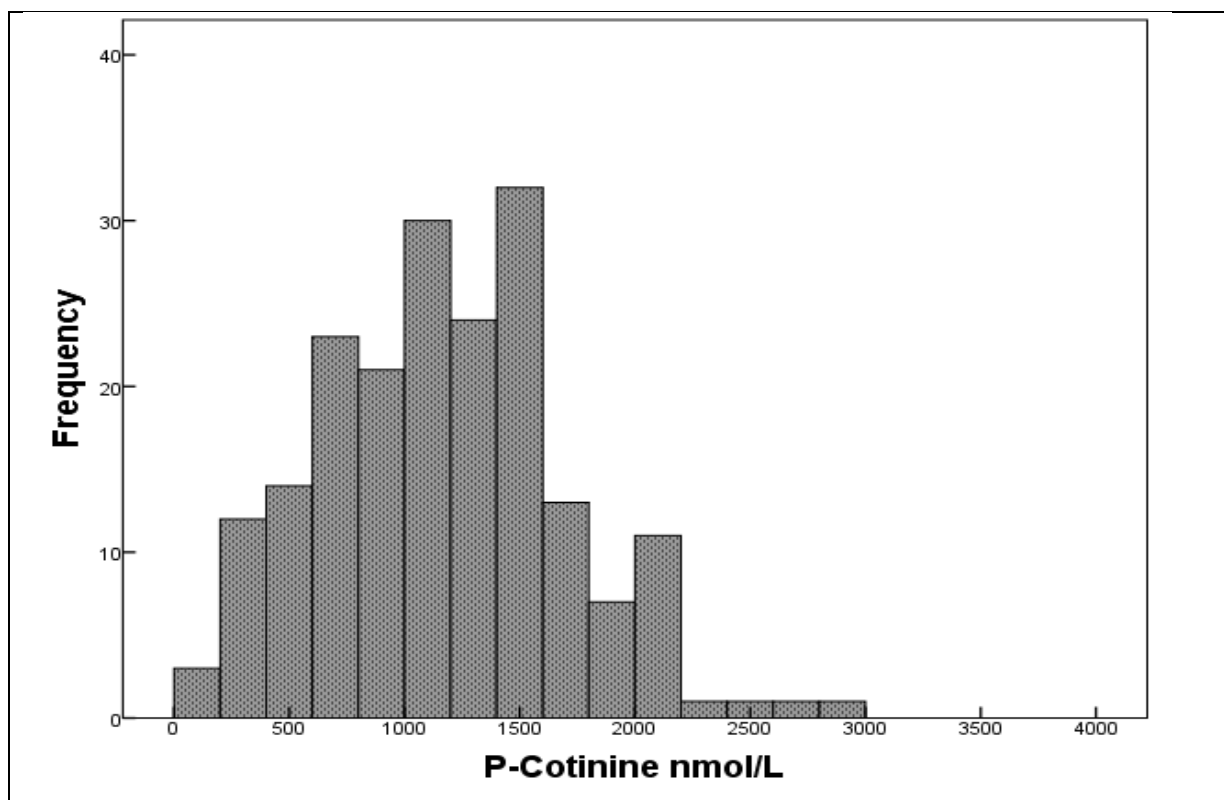

Figure S2. Distribution of plasma cotinine concentrations among self-reported smokers.

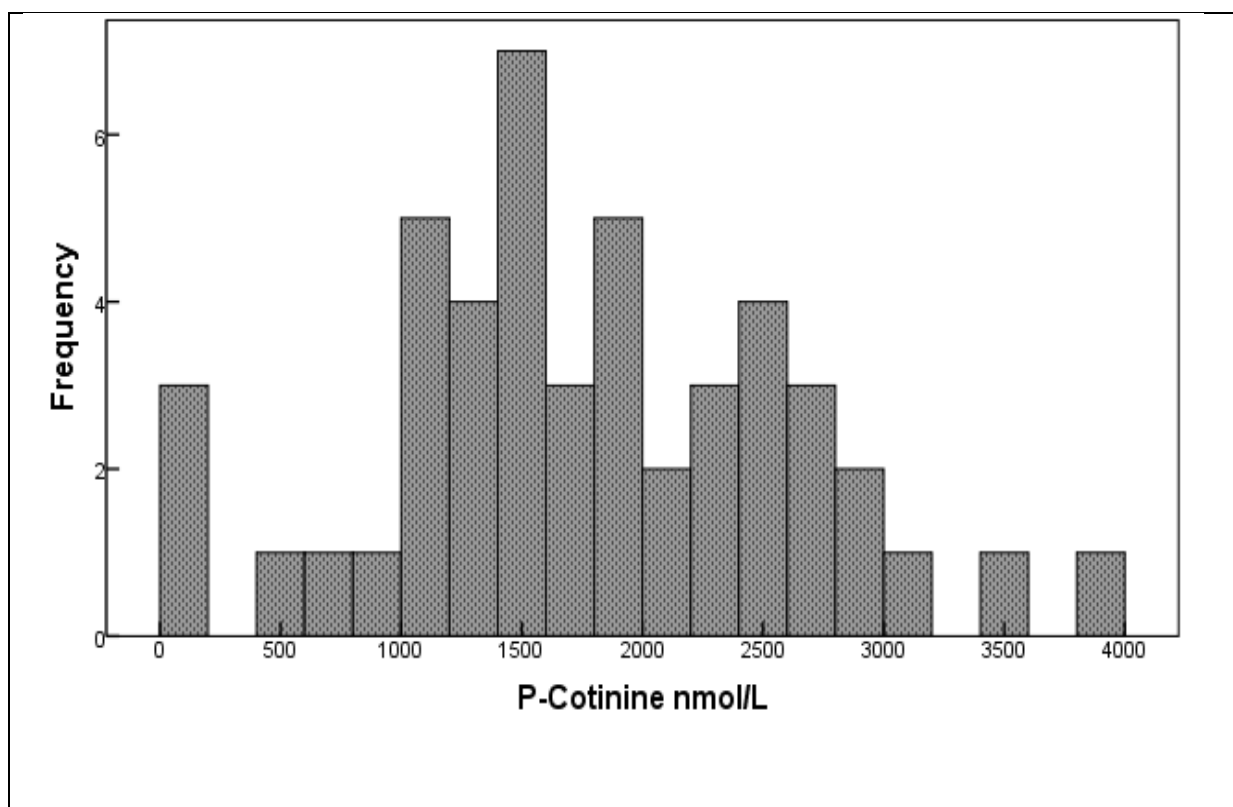

Figure S3. Distribution of plasma cotinine concentrations among self-reported snus-only users (i.e., non-smokers).
